# Supplementary material for: Microwave-assisted MgO NP catalyzed one-pot multicomponent synthesis of polysubstituted steroidal pyridines
Source: Royal Society of Chemistry journal article supplement (doi:10.1039/c7nj03742b), 2017-11-20

## Supplementary Information

### **Microwave-assisted MgO NPs catalysed one-pot multicomponent synthesis of polysubstituted steroidal pyridines**

**Anam Ansari<sup>a</sup>, Abad Ali<sup>a,b</sup>, Mohd Asif<sup>a</sup>, Shamsuzzaman<sup>a\*</sup>**

*<sup>a</sup>Steroid Research Laboratory, Department of Chemistry, Aligarh Muslim University, Aligarh 202 002, India*

*<sup>b</sup>Organometallic Synthesis and Catalysis Group, Chemical Engineering Division, CSIR-National Chemical Laboratory (CSIR-NCL), Dr. Homi Bhabha Road, Pune 411 008, Maharashtra, India*

*\*Corresponding author, E-mail address: shamsuzzaman9@gmail.com; phone no +919411003465*

# Figures of <sup>1</sup>HNMR and <sup>13</sup>CNMR

## <sup>1</sup>HNMR of 13b

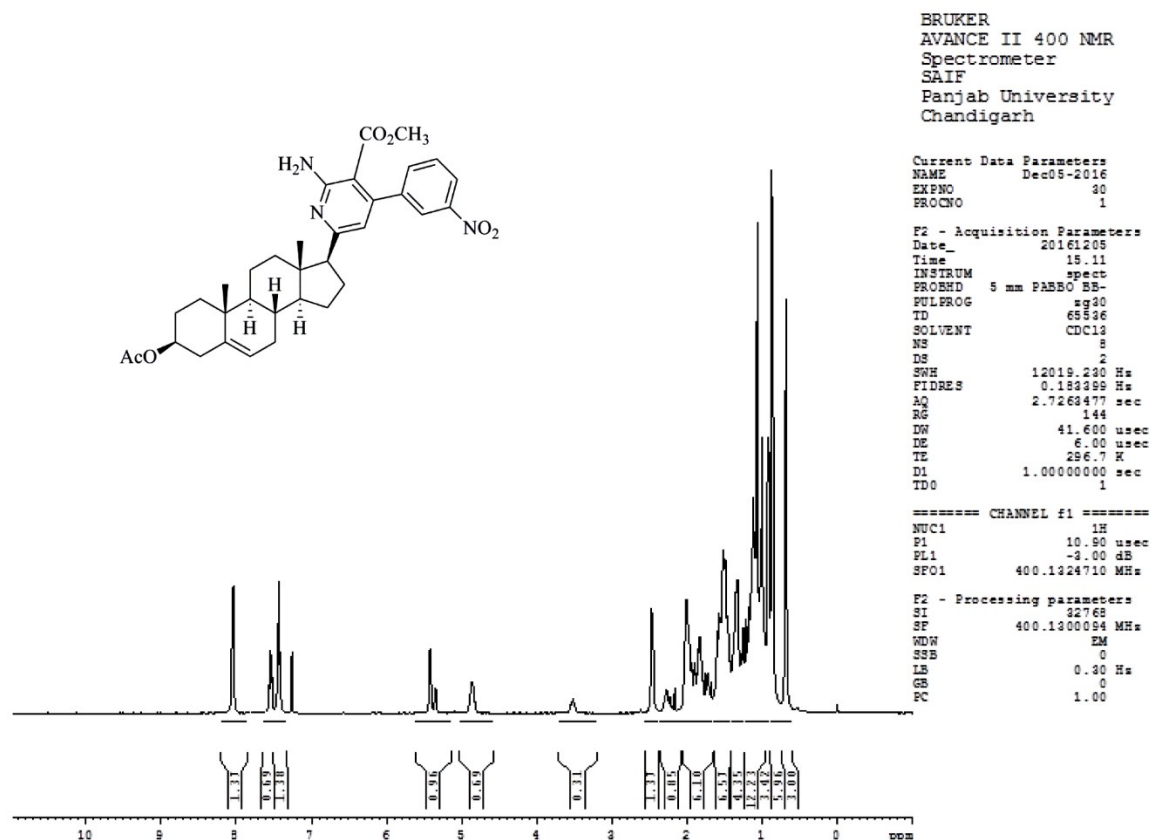

<sup>13</sup>CNMR of 13b

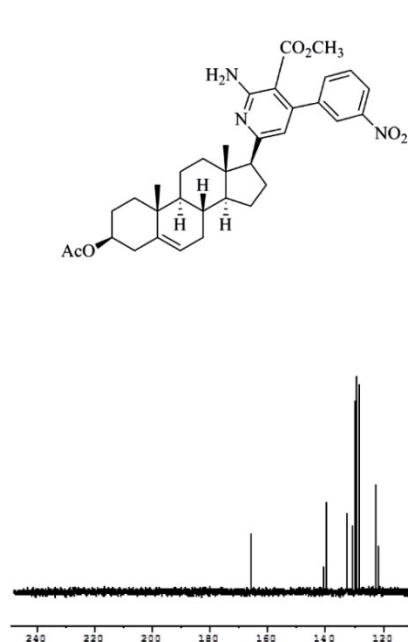

BRUKER  
AVANCE II 400 NMR  
Spectrometer  
SAIF  
Panjab University  
Chandigarh

Current Data Parameters  
NAME Jan14-2017  
EXPNO 31  
PROCNO 1  
F2 - Acquisition Parameters  
Date\_ 20170115  
Time 8.56  
INSTRUM spect  
PROBHD 5 mm PABBO BB-  
PULPROG zgpg30  
TD 65536  
SOLVENT CDCl3  
NS 1024  
DS 4  
SWH 29761.904 Hz  
FIDRES 0.464131 Hz  
AQ 1.1010548 sec  
RG 812  
DW 16.800 usec  
DE 6.00 usec  
TE 292.8 K  
D1 2.00000000 sec  
d11 0.03000000 sec  
DELTA 1.89999998 sec  
TD0 1

===== CHANNEL f1 =====  
NUC1 13C  
P1 9.60 usec  
PL1 -2.00 dB  
SFO1 100.6228298 MHz  
===== CHANNEL f2 =====  
CPDPRG2 waltz16  
NUC2 1H  
PCPD2 80.00 usec  
PL2 -3.00 dB  
PL12 14.31 dB  
PL13 18.00 dB  
SFO2 400.1316005 MHz

F2 - Processing parameters  
SI 32768  
SF 100.6127718 MHz  
WDW EM  
SSB 0  
LB 1.00 Hz  
GB 0  
PC 1.40

<sup>1</sup>HNMR of 4

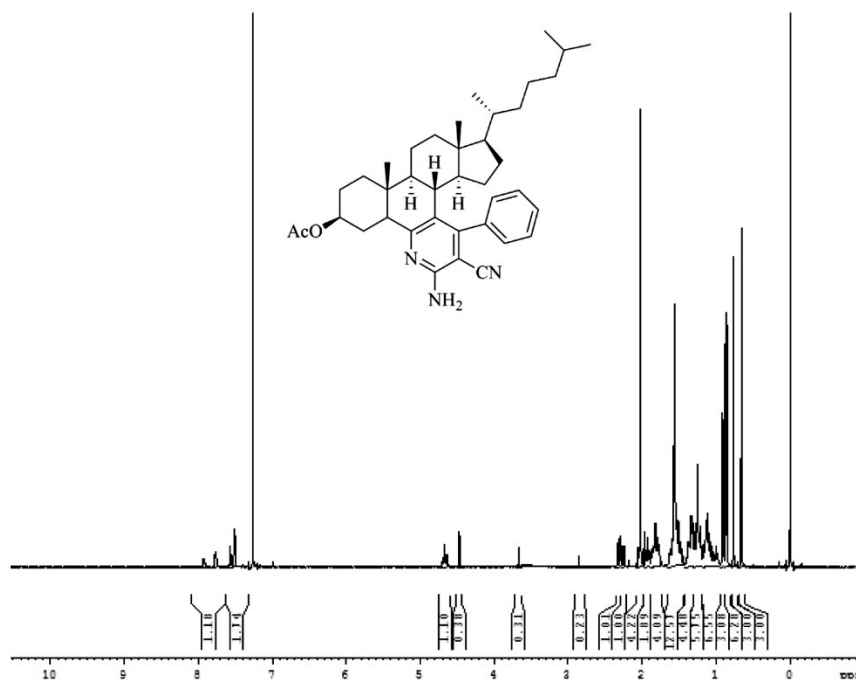

BRUKER  
AVANCE II 400 NMR  
Spectrometer  
SAIF  
Panjab University  
Chandigarh

Current Data Parameters  
NAME Apr09-2016  
EXPNO 300  
PROCNO 1

F2 - Acquisition Parameters  
Date\_ 20160409  
Time 13.27  
INSTRUM spect  
PROBHD 5 mm PABBO BB-  
PULPROG zg30  
TD 65536  
SOLVENT CDCl3  
NS 2  
DS 2  
SWH 12019.200 Hz  
FIDRES 0.183395 Hz  
AQ 2.7263477 sec  
RG 512  
DW 41.600 usec  
DE 6.00 usec  
TE 294.3 K  
D1 1.00000000 sec  
TD0 1

===== CHANNEL f1 =====  
NUC1 1H  
P1 10.90 usec  
PL1 -3.00 dB  
SFO1 400.1324710 MHz

F2 - Processing parameters  
SI 32768  
SF 400.1300037 MHz  
WDW EM  
SSB 0  
LB 0.30 Hz  
GB 0  
PC 1.00

<sup>1</sup>HNMR of 8

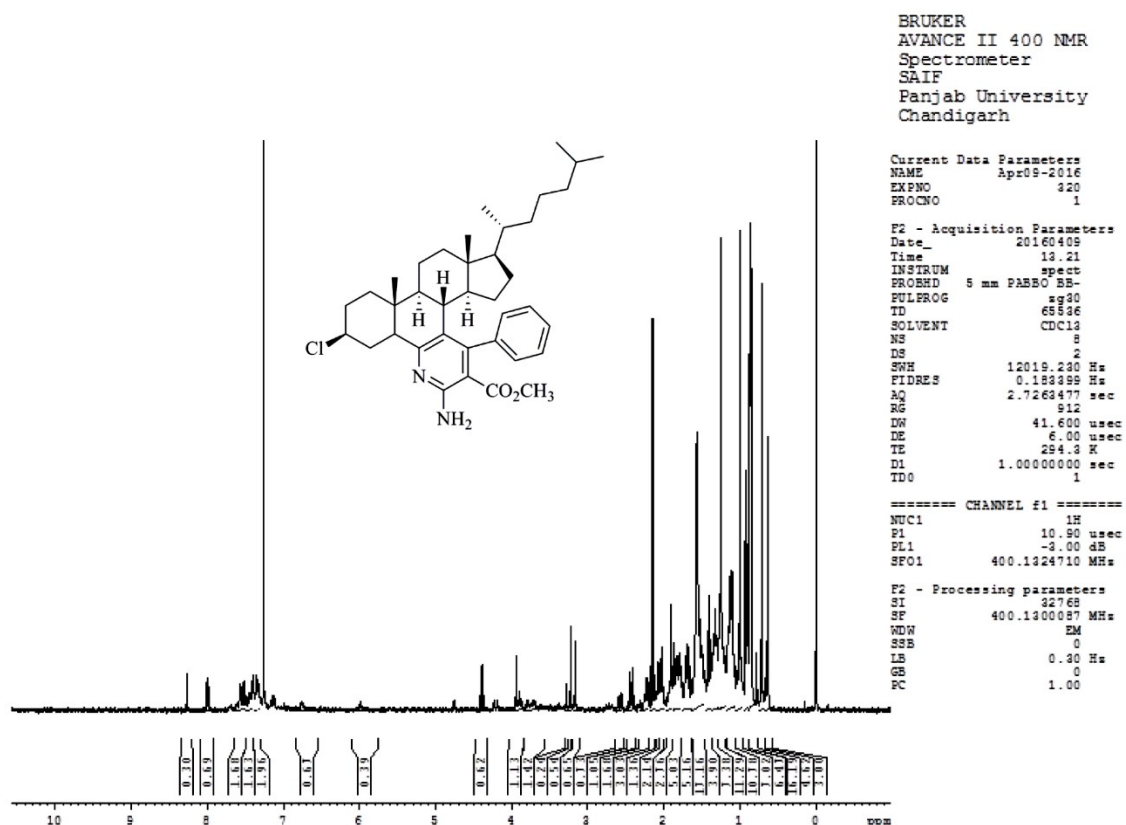

<sup>1</sup>HNMR of 9

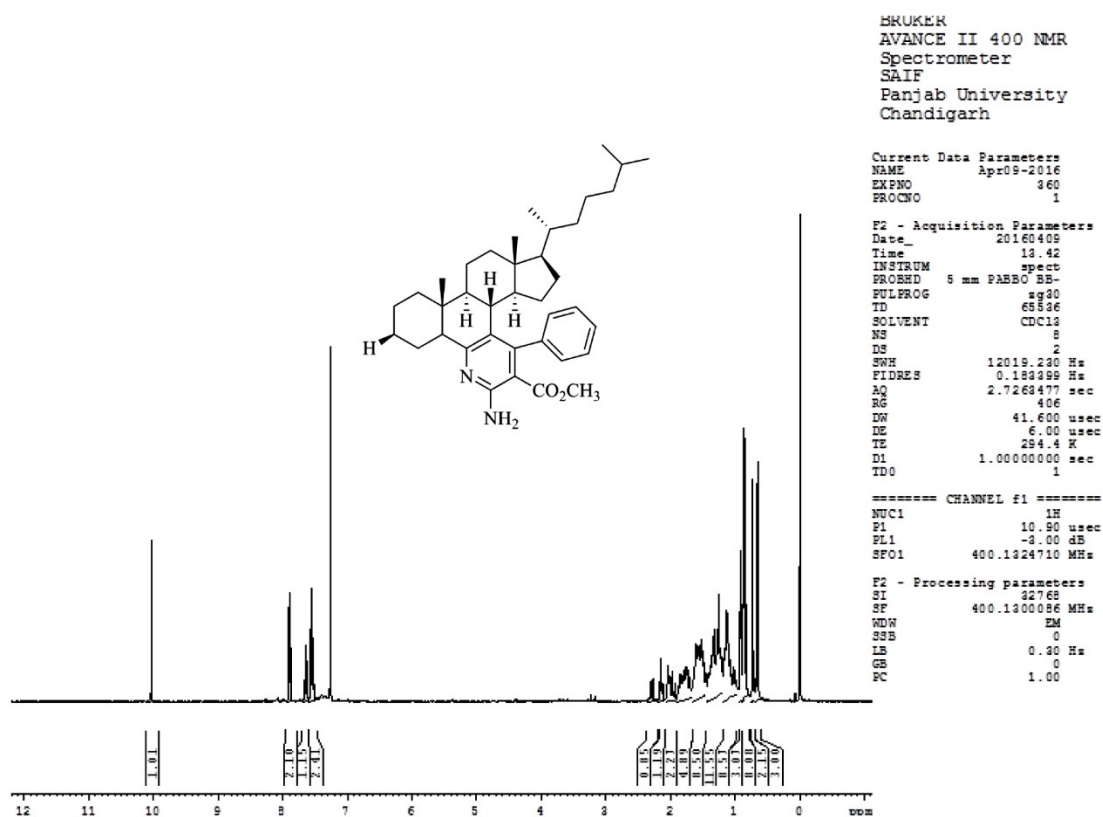

<sup>1</sup>H NMR of 12a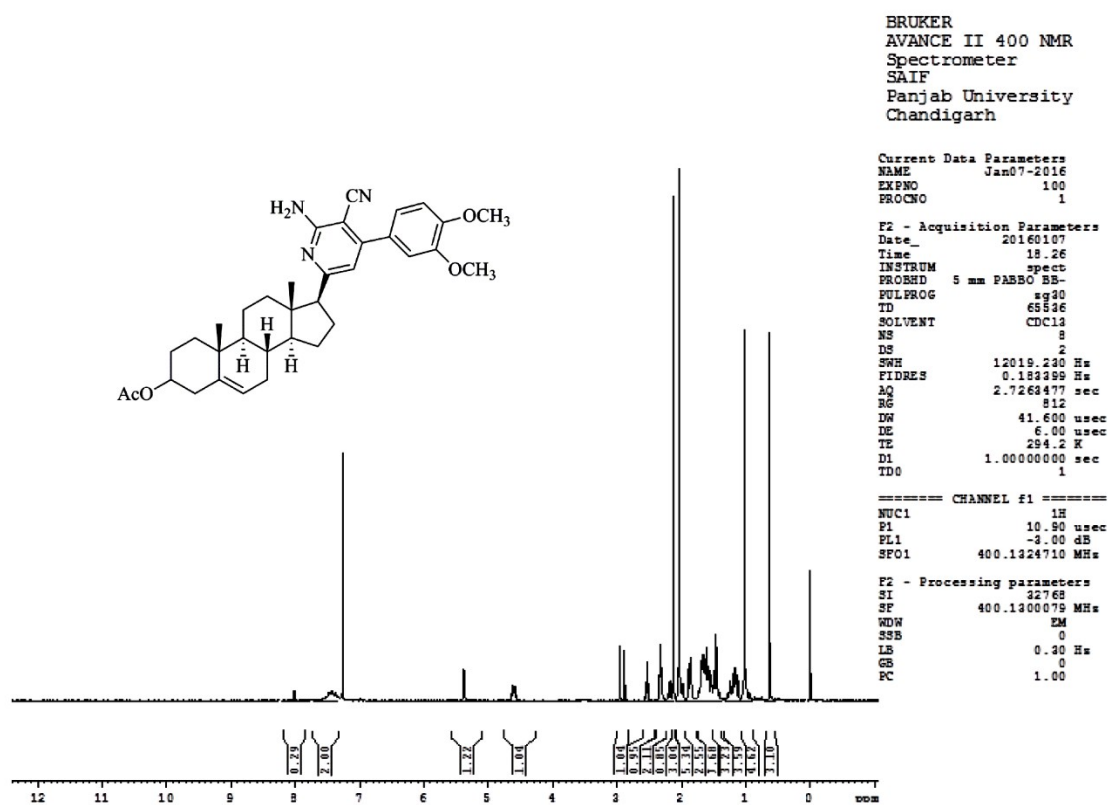<sup>1</sup>H NMR of 12d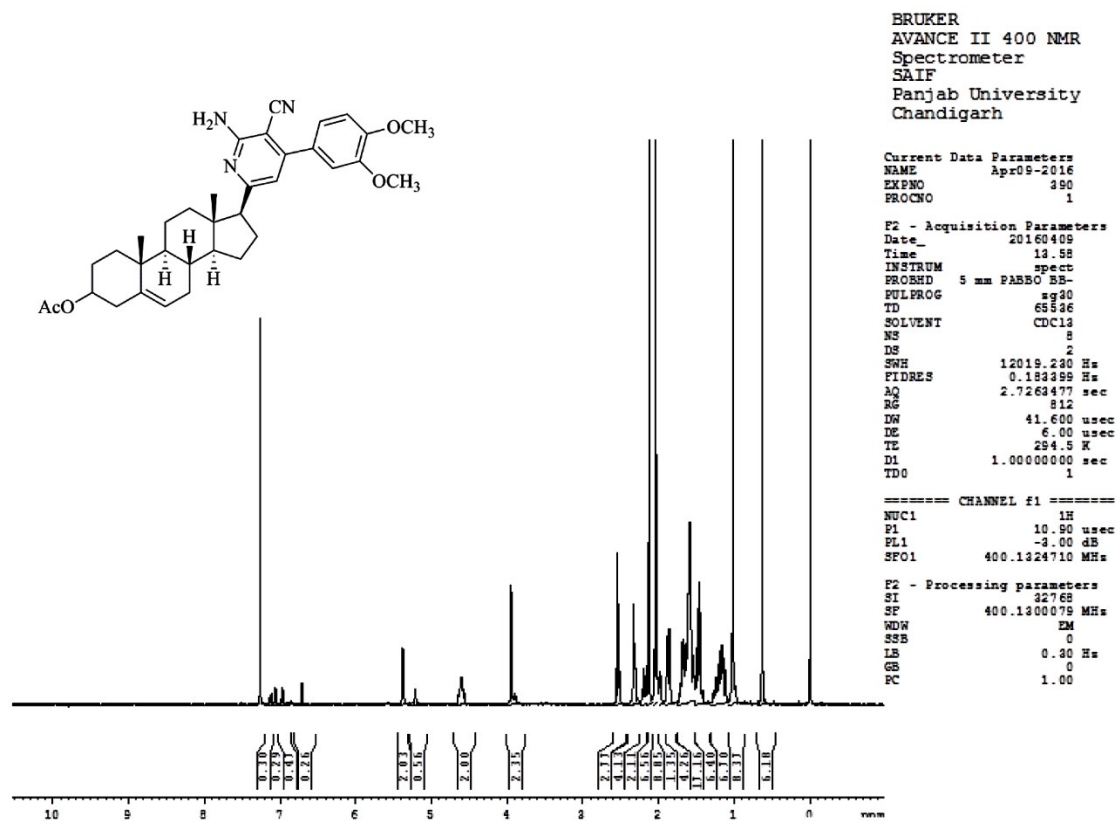

<sup>1</sup>HNMR of 13a

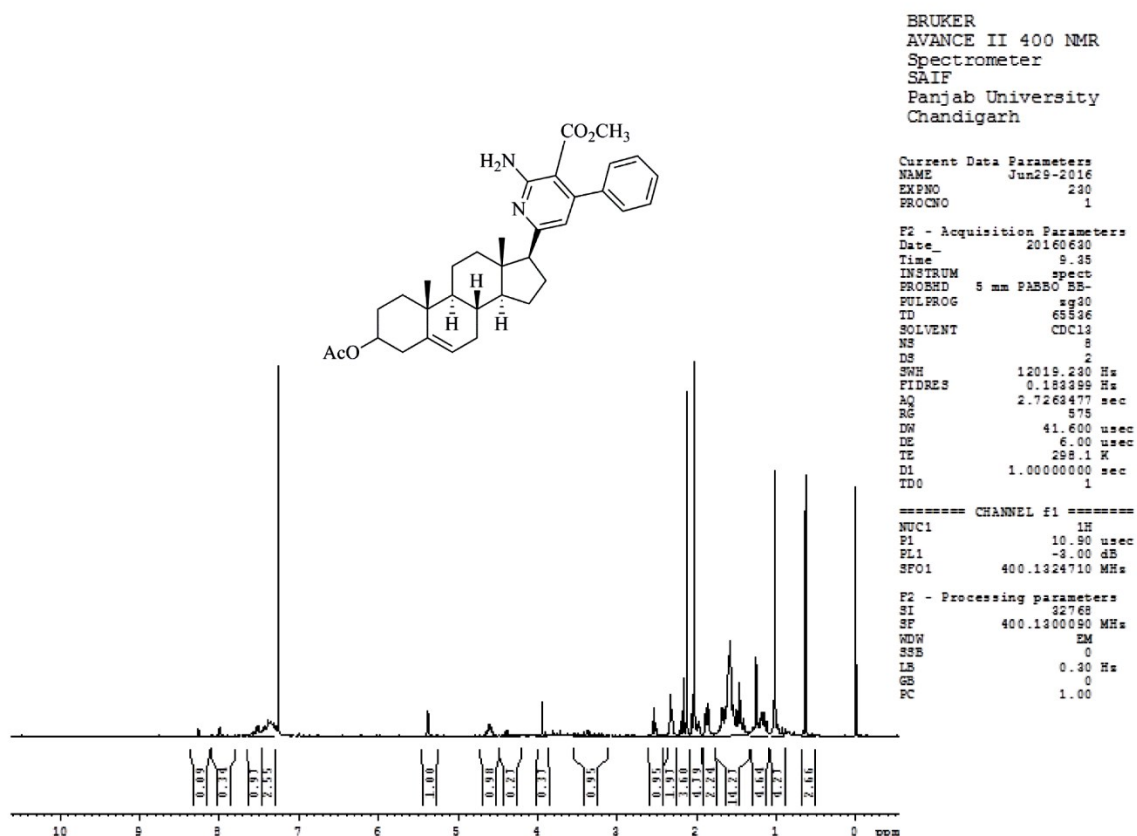

<sup>1</sup>HNMR of 13c

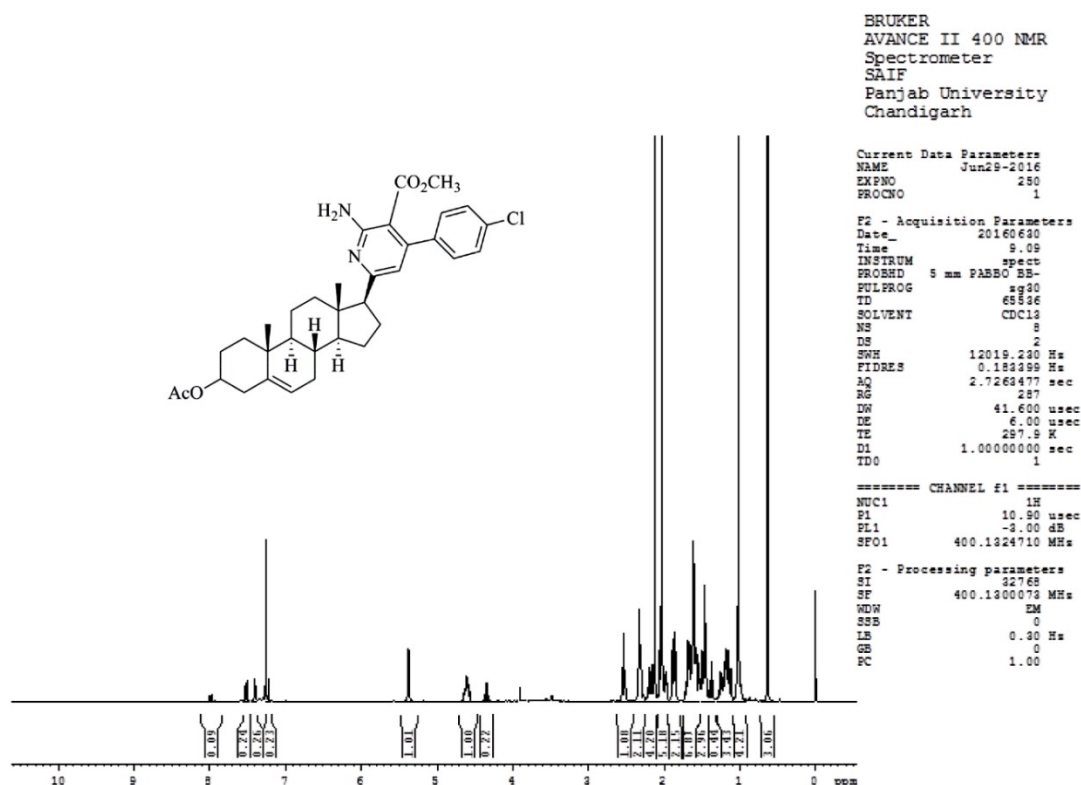

Supplement: c7nj03742b1.pdf [file c7nj03742b1.pdf]
